# Supplementary material for: Cardiac Rehabilitation for Older Women with Heart Failure
Source: MDPI journal article supplement (doi:10.3390/jpm12121980), 2022-11-30
Supplement: s1 [file s1]

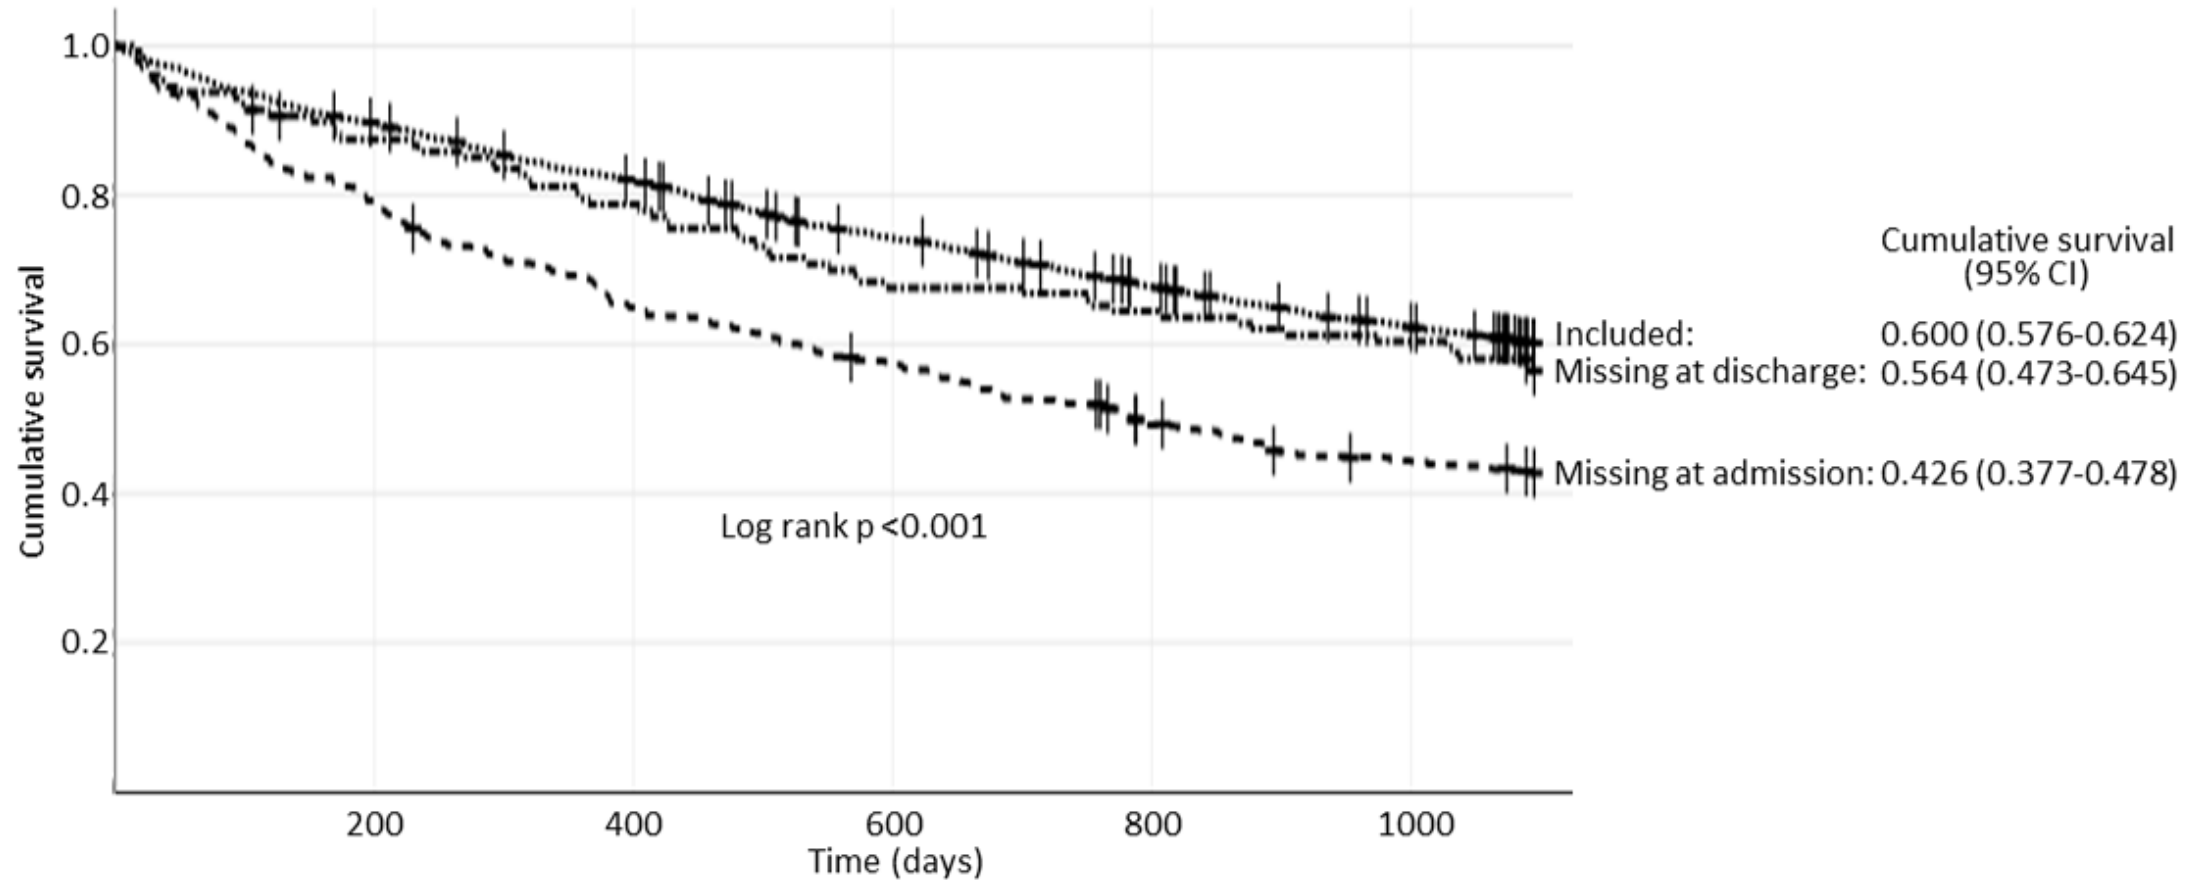

**Figure S1.** Survival curves for patients with missing data for 6-min walk test at admission or at discharge, compared with included patients.
